# Supplementary material for: Preparation of nanoporous array anodic titanium wire supported solid-phase microextraction fiber coated with a copolymerized polymerizable ionic liquid monomer pair
Source: Royal Society of Chemistry journal article supplement (doi:10.1039/c4ay00504j), 2014-07-04
Supplement: c4ay00504j1.pdf [file c4ay00504j1.pdf]

## Electronic supporting information

### Development of a highly robust solid phase microextraction fiber based on copolymerized polymerizable ionic liquid monomer pair coating

Jing Jia<sup>a,b</sup>, Shujuan Liu<sup>a</sup>, Yong Guo<sup>a</sup>, Shuai Wang<sup>a\*</sup>, Xia Liu<sup>a\*</sup>

<sup>a</sup> Key Laboratory for Natural Medicine of Gansu Province, Lanzhou Institute of Chemical Physics, Chinese Academy of Sciences, Lanzhou 730000, China. E-mail address: [gsliaxia@lzb.ac.cn](mailto:gsliaxia@lzb.ac.cn) (Xia Liu) [shuaiw@licp.cas.cn](mailto:shuaiw@licp.cas.cn) (Shuai Wang); Tel: +86 931 4968203; fax: +86-931-8277088.

<sup>b</sup> University of Chinese Academy of Sciences, Beijing 100039, China

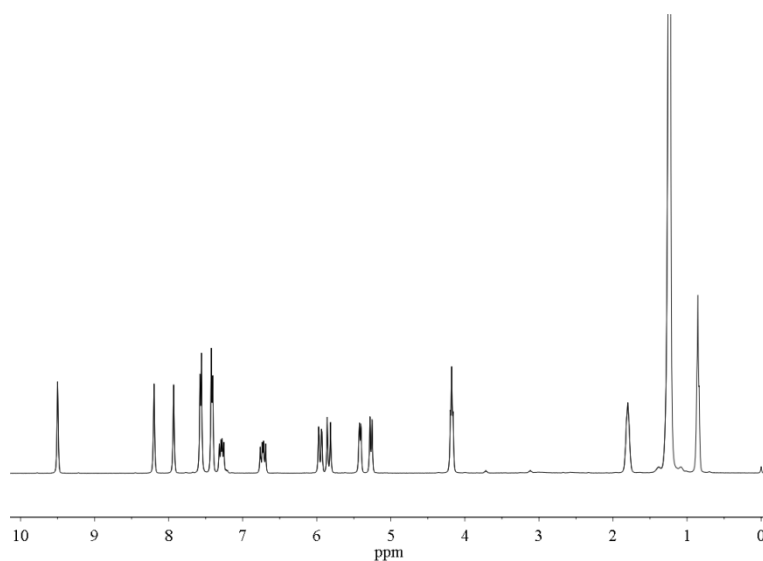

Fig. S1 <sup>1</sup>H NMR of [C<sub>16</sub>VIm]<sup>+</sup>SS<sup>-</sup>.

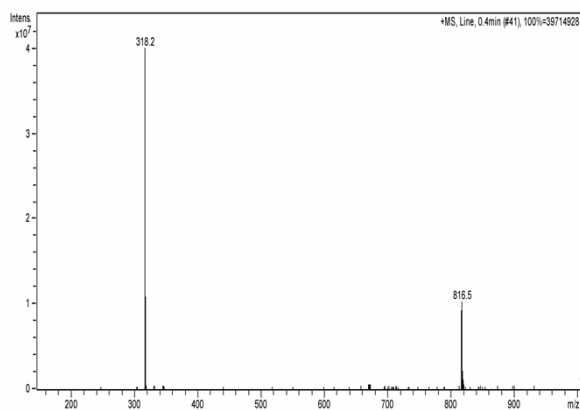

Fig. S2 IT-MS (Positive Ion Mode) for  $[\text{C}_{16}\text{VIm}]^+\text{SS}^-$ .  $m/z [\text{C}_{16}\text{VIm}^+] = 318.2$  amu,  $m/z [(2\text{C}_{16}\text{VIm}^+)\text{SS}^-] = 816.5$  amu.

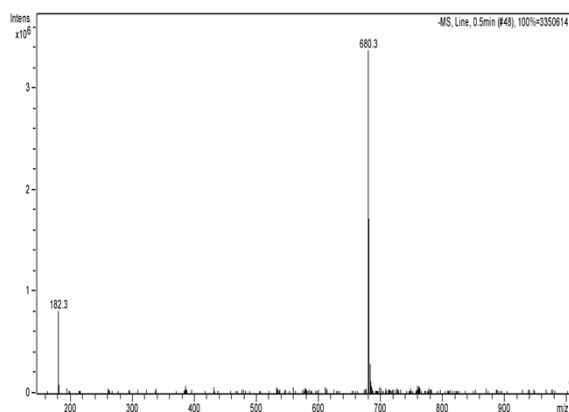

Fig. S3 IT-MS (Negative Ion Mode) for  $[\text{C}_{16}\text{VIm}]^+\text{SS}^-$ .  $m/z [\text{SS}^-] = 182.3$  amu,  $m/z [\text{C}_{16}\text{VIm}^+(2\text{SS}^-)] = 680.3$  amu.
